# Supplementary material for: Analysis of the Complete Plastomes of 31 Species of Hoya Group: Insights Into Their Comparative Genomics and Phylogenetic Relationships
Source: PubMed Central journal article supplement (PMC8862764; doi:10.3389/fpls.2021.814833), 2022-02-08
Supplement: Data_Sheet_1.pdf [file Data_Sheet_1.pdf]

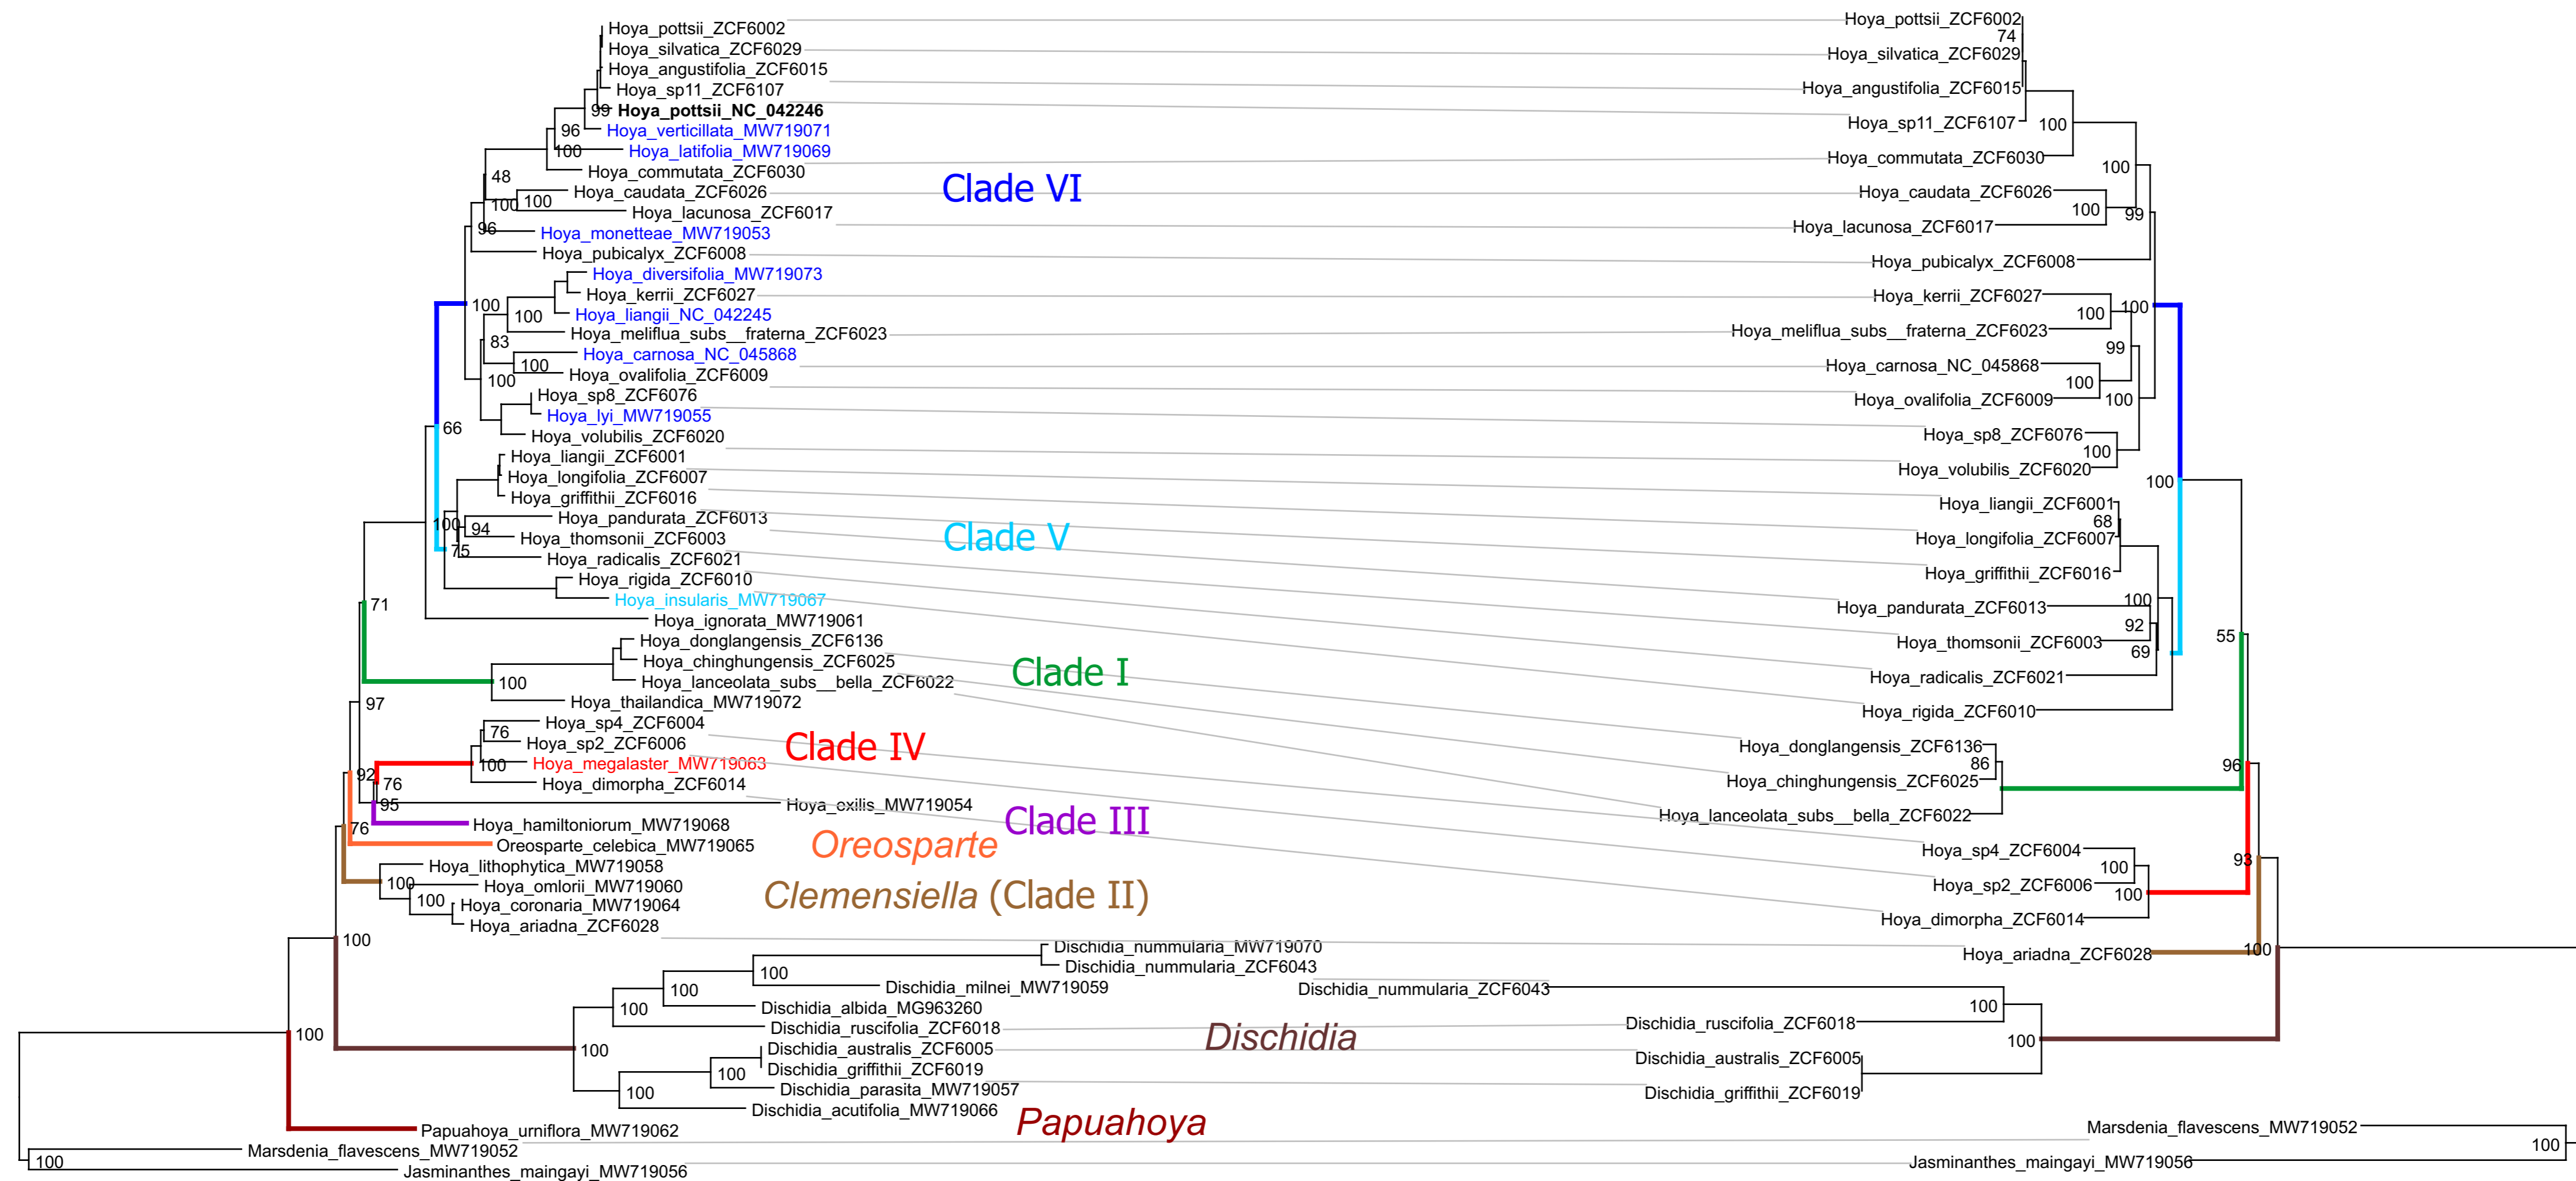

Figure S1: Hoya group clade sampling tanglegram for all the 31 species.
